# Supplementary material
Source: publisher site journal article supplement (https://www.dovepress.com/article/221669)
Supplement: Supplementary file 1 [file get_supplementary_file.php]

## Supplementary file for

### Enhanced cellular uptake of phenamil through inclusion complex with histidine functionalized $\beta$ -Cyclodextrin as a penetrative osteo-inductive agent

Vahid Jahed<sup>a</sup>, Ebrahim Vasheghani Farahani<sup>a\*</sup>, Fatemeh Bagheri<sup>b</sup>, Ali Zarrabi<sup>c</sup>, Trine Fink<sup>d</sup>, Kim Lambertsen Larsen<sup>e\*</sup>

<sup>a</sup> Biomedical Engineering Division, Faculty of Chemical engineering, Tarbiat Modares University, Tehran, Iran

<sup>b</sup> Department of Biotechnology, Faculty of Chemical engineering, Tarbiat Modares University, Tehran, Iran

<sup>c</sup> Sabanci University Nanotechnology Research and Application Center (SUNUM), Tuzla, 34956, Istanbul, Turkey

<sup>d</sup> Department of Health Science and Technology, Faculty of Health, Aalborg University, Aalborg, Denmark

<sup>e</sup> Department of Chemistry and Bioscience, Faculty of Chemistry, Aalborg University, Aalborg, Denmark

---

\* Corresponding authors emails: Ebrahim Vasheghani Farahani: [evf@modares.ac.ir](mailto:evf@modares.ac.ir), Kim Lambertsen Larsen [kll@bio.aau.dk](mailto:kll@bio.aau.dk)

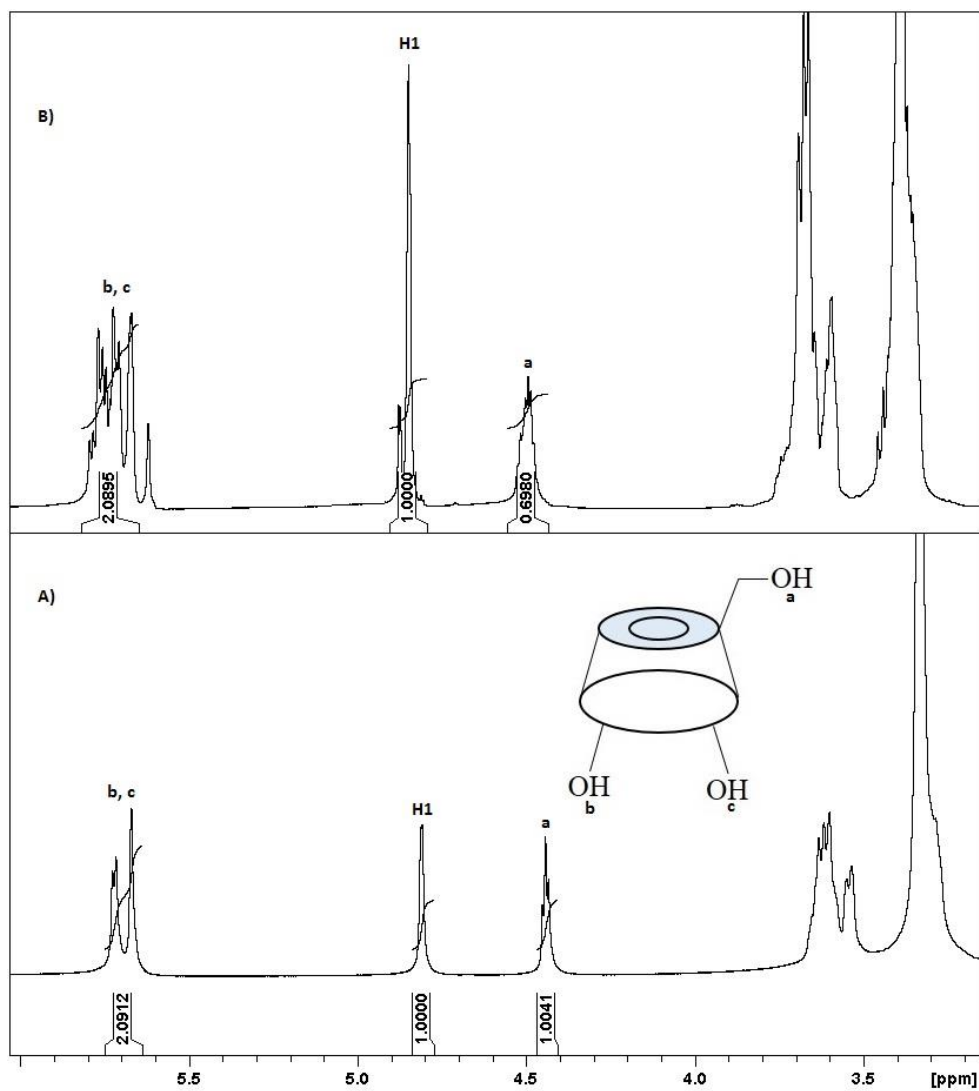

**S 1.**  $^1\text{H}$  NMR spectra of A)  $\beta\text{CD}$ , and B) Amine- $\beta\text{CD}$  in  $\text{dms}\text{-d}_6$  to confirm selective reaction on primary hydroxyl (integral calibration was done on H1 peak)

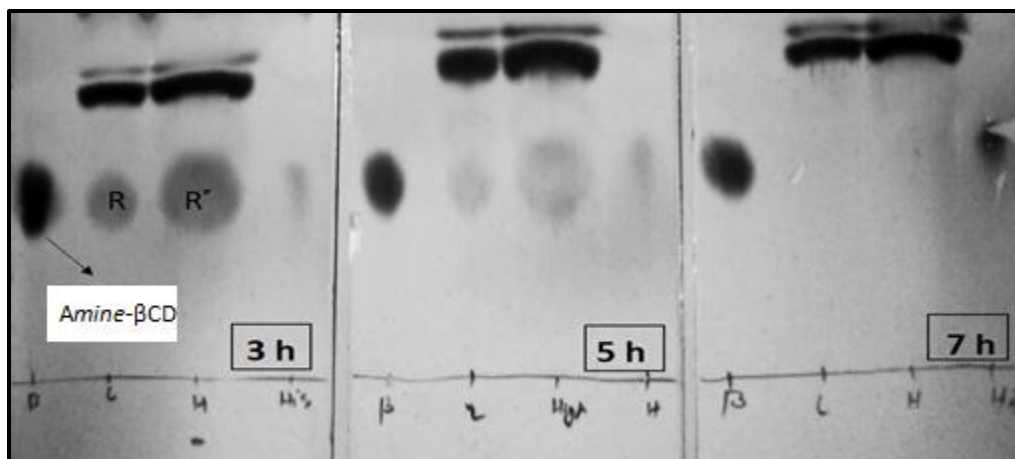

**S 2.** TLC plates of Amine- $\beta$ CD conversion to His- $\beta$ CD after 3, 5 and 7 hours. Arrow shows Amine- $\beta$ CD before of reaction, R and R' assigned to low and high concentration of reaction respectively.

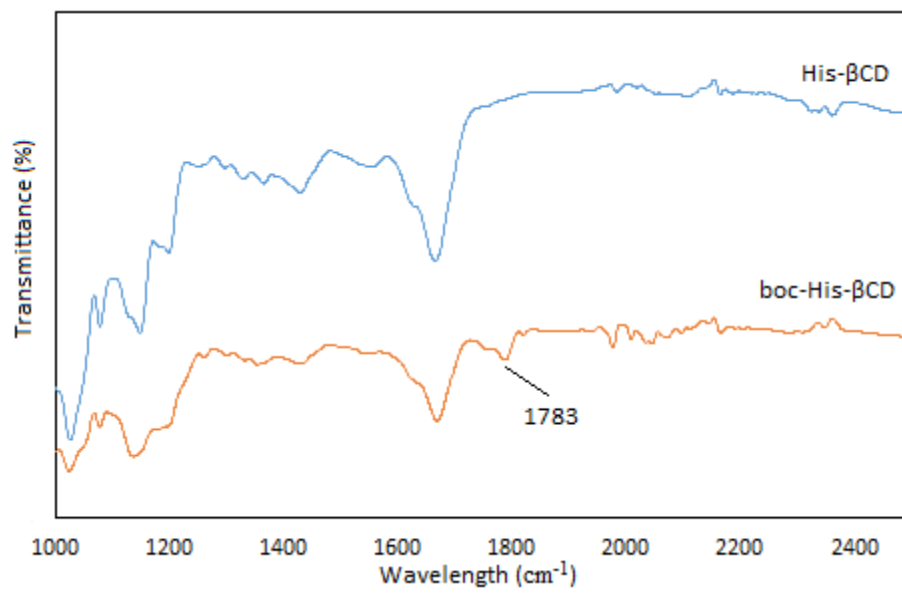

**S 3.** FTIR spectra of His-βCD deprotection.

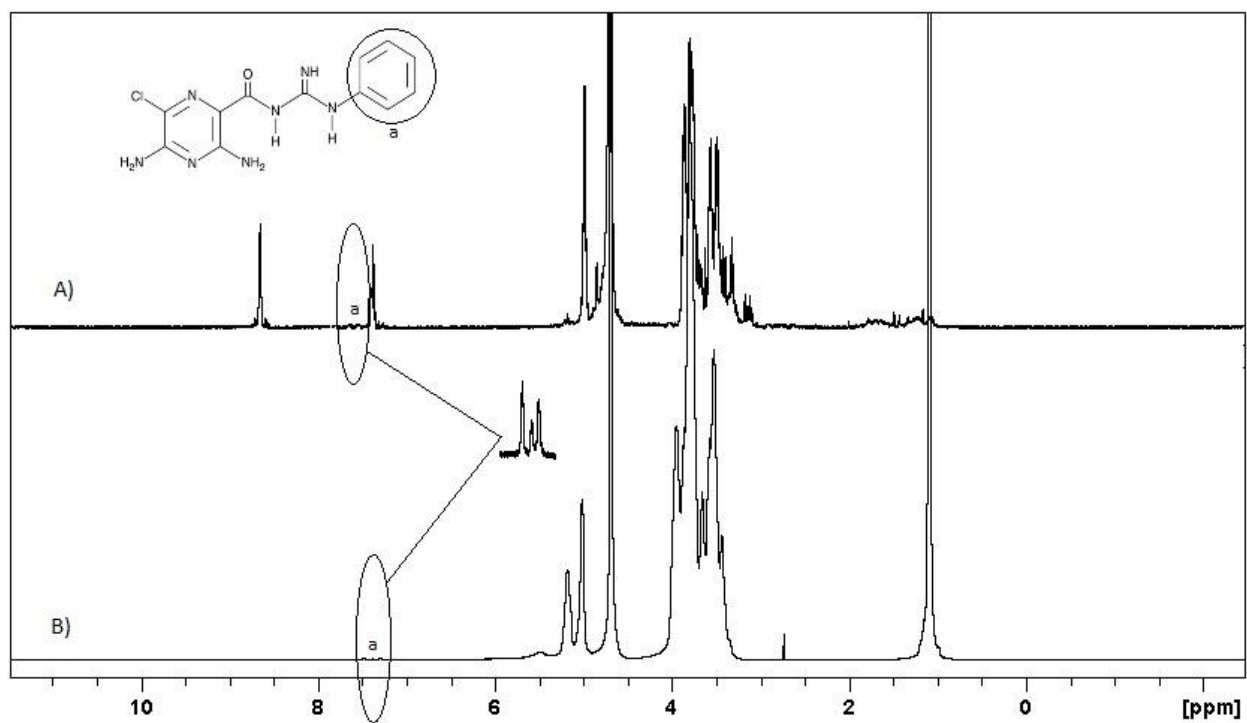

**S 4.** <sup>1</sup>H NMR spectra of A) His-βCD-PH, B) HP-βCD-PH. Due to the small amount of PH, weak peaks in the range of 7 to 8 ppm related to benzene ring of PH were appeared
